# Supplementary material for: Complete Genome Sequence and Comparative Genomics of a Novel Myxobacterium Myxococcus hansupus
Source: PLoS One. 2016 Feb 22;11(2):e0148593. doi: 10.1371/journal.pone.0148593 (PMC4765838; doi:10.1371/journal.pone.0148593)
Supplement: S3 Table — All proteins were mapped between two genomes and their mapping percentage to each genome is represented here with high to low (red-yellow-green) shading order. The matrix should be read as % proteins of [row] genome mapped against [column] genome. (XLS) [file pone.0148593.s005.xls]

## Sheet: Sheet1
S3 Table: All-to-all protein content comparison matrix
		Mf	Ms	MxDK1622	MxDZ2	MxDZF1	Mh
	Mf	100	76.6043	85.9545	85.9007	85.9142	85.4837
	Ms	69.2994	100	71.494	71.4458	71.4458	71.9161
	MxDK1622	84.4763	77.4455	100	99.2158	99.1361	84.7687
	MxDZ2	83.665	76.0697	99.0636	100	99.5448	83.756
	MxDZF1	83.5714	75.8312	98.961	99.4156	100	83.5714
	Mh	82.7035	76.8219	83.3613	83.2968	83.3613	100
