# Supplementary material for: Complete Genome Sequence and Comparative Genomics of a Novel Myxobacterium Myxococcus hansupus
Source: PLoS One. 2016 Feb 22;11(2):e0148593. doi: 10.1371/journal.pone.0148593 (PMC4765838; doi:10.1371/journal.pone.0148593)
Supplement: S4 Table — BLASTp results were filtered on the basis of cut-off values [E-value: 1e-5, query coverage: 50% and identity: 35%] and protein homologs were clustered. Singleton proteins, proteins present in clusters and numbers of clusters are shown in column D, E and G. (XLS) [file pone.0148593.s006.xls]

## Sheet: Sheet1
S4 Table: Protein clustering analysis between Myxococcus genomes
		Total Protein	Single copy proteins	Cluster Proteins	Cluster Proteins%	Cluster count
	Mf	7432	5333	2099	28.2427	643
	Ms	8293	5646	2647	31.9185	660
	MxDK1622	7524	5207	2317	30.7948	590
	MxDZ2	7689	5180	2509	32.631	642
	MxDZF1	7700	5172	2528	32.8312	651
	Mh	7753	5307	2446	31.5491	629
	Average	7731.83	5307.5	2424.33	31.3279	635.833
